# Supplementary material for: Clinical efficacy of a benazepril and spironolactone combination in dogs with congestive heart failure due to myxomatous mitral valve disease: The BEnazepril Spironolactone STudy (BESST)
Source: PubMed Central journal article supplement — J Vet Intern Med. 2021 May 24;35(4):1673–87. doi: 10.1111/jvim.16155 (PMC8295662; doi:10.1111/jvim.16155), 2021-05-24
Supplement: JVIM-35-1673-s001.pdf [file JVIM-35-1673-s001.pdf]

**Table S1. List of variables used in the univariable analysis**

**Variables**

---

Treatment (S+BNZ vs BNZ)  
Sex (Male vs Female)  
Neutered (Yes vs No)  
ACE-I given before Day-30 (Yes vs No)  
Age (>11 years vs ≤ 11 years)  
Heart rate (>140 bpm vs ≤ 140 bpm)  
Appetite (0 vs >0)  
Dyspnea (0 vs >0)  
Exercise intolerance (0 vs >0)  
Syncope (0 vs >0)  
Weight (>6.8 kg vs ≤ 6.8 kg)  
Creatinine (>0.9 mg/dL vs ≤ 0.9 mg/dL)  
Phosphorus (>4.3 mg/dl vs ≤ 4.3 mg/dL)  
Chloride (>110 mEq/L vs ≤ 110 mEq/L)  
Sodium (>150 mEq/L vs ≤ 150 mEq/L)  
Potassium (>4.5 mEq/L vs ≤ 4.5 mEq/L)  
BUN (>25.5 mg/dL vs ≤ 25.5 mg/dL)  
FETCH score (23 vs ≤ 23)  
VHS (>11.9 vs ≤ 11.9)  
LA:Ao (>2.2 vs ≤ 2.2)  
LVIDD (>2.1 vs ≤ 2.1)  
LVIDS (>1 vs ≤ 1)  
Furosemide dose (>4.12 mg/kg vs ≤ 4.12 mg/kg)  
Blood pressure (>131 mmHg vs ≤ 131 mmHg)

**Table S2. Area under the curve, adjusted for days in study on the efficacy population.  
Data listed as median (interquartile range).**

| <b>Variables</b>      | <b>S+BNZ (n=216)</b> | <b>BNZ (n=198)</b> | <b>P</b> |
|-----------------------|----------------------|--------------------|----------|
| Appetite              | 0.0 (0.0-0.5)        | 0.0 (0.0-0.5)      | .78      |
| Cough                 | 1.2 (0.8-1.8)        | 1.1 (0.7-1.6)      | .35      |
| Dyspnea               | 0.2 (0.0-0.6)        | 0.3 (0.0-0.6)      | .38      |
| Exercise Intolerance  | 0.5 (0.0-1.0)        | 0.4 (0.0-0.8)      | .30      |
| Syncope               | 0.0 (0.0-0.0)        | 0.0 (0.0-0.0)      | .71      |
| BCS Score             | 5.0 (4.0-5.4)        | 5.0 (4.3-5.5)      | 1.00     |
| FETCH Score           | 19.8 (11.6-31.1)     | 18.4 (12.0-38.0)   | .76      |
| Pulmonary Edema Score | 0.5 (0.0-1.0)        | 0.6 (0.1-1.0)      | .71      |
