# Supplementary figures and images for: Clinical efficacy of a benazepril and spironolactone combination in dogs with congestive heart failure due to myxomatous mitral valve disease: The BEnazepril Spironolactone STudy (BESST)
Source: PubMed Central journal article supplement — J Vet Intern Med. 2021 May 24;35(4):1673–87. doi: 10.1111/jvim.16155 (PMC8295662; doi:10.1111/jvim.16155), 2021-05-24

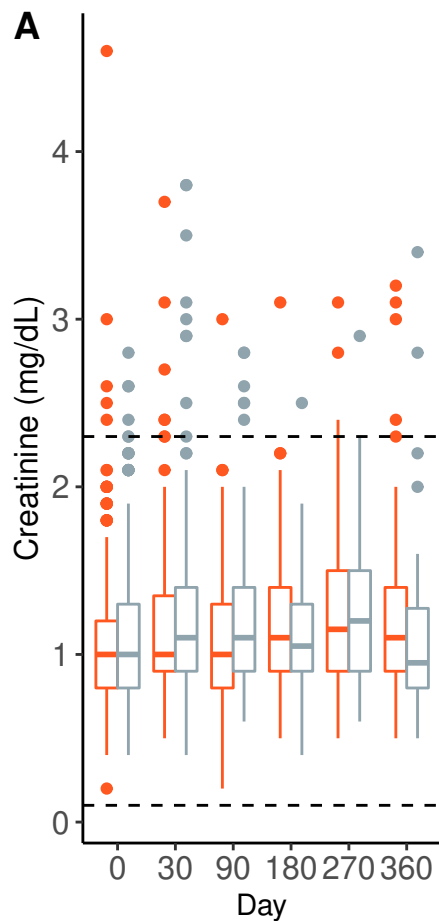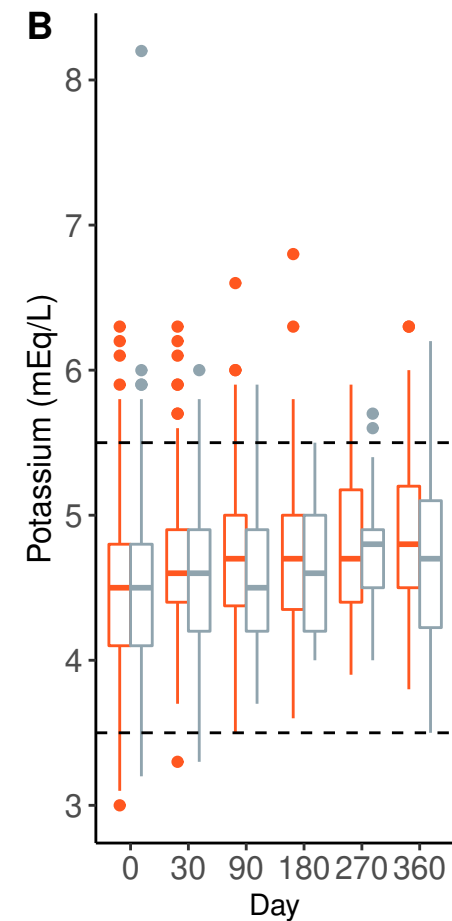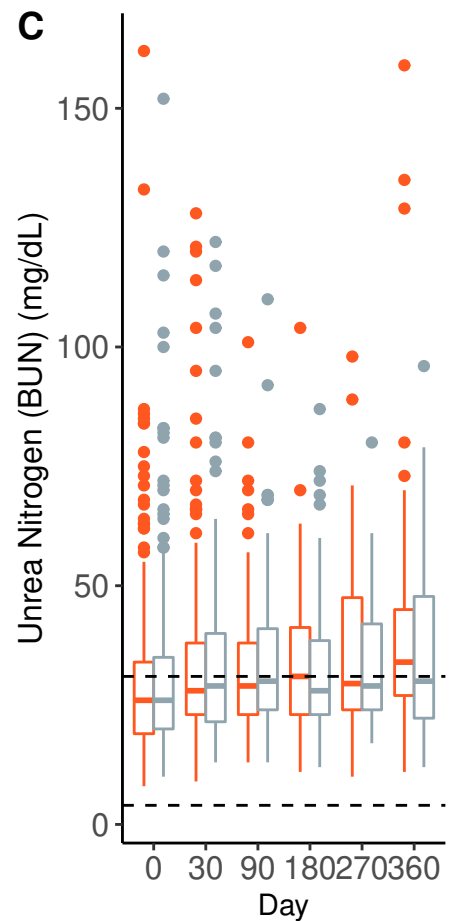

Treatment  S+BNZ  BNZ

Supplement: JVIM-35-1673-s002.pdf [file JVIM-35-1673-s002.pdf]

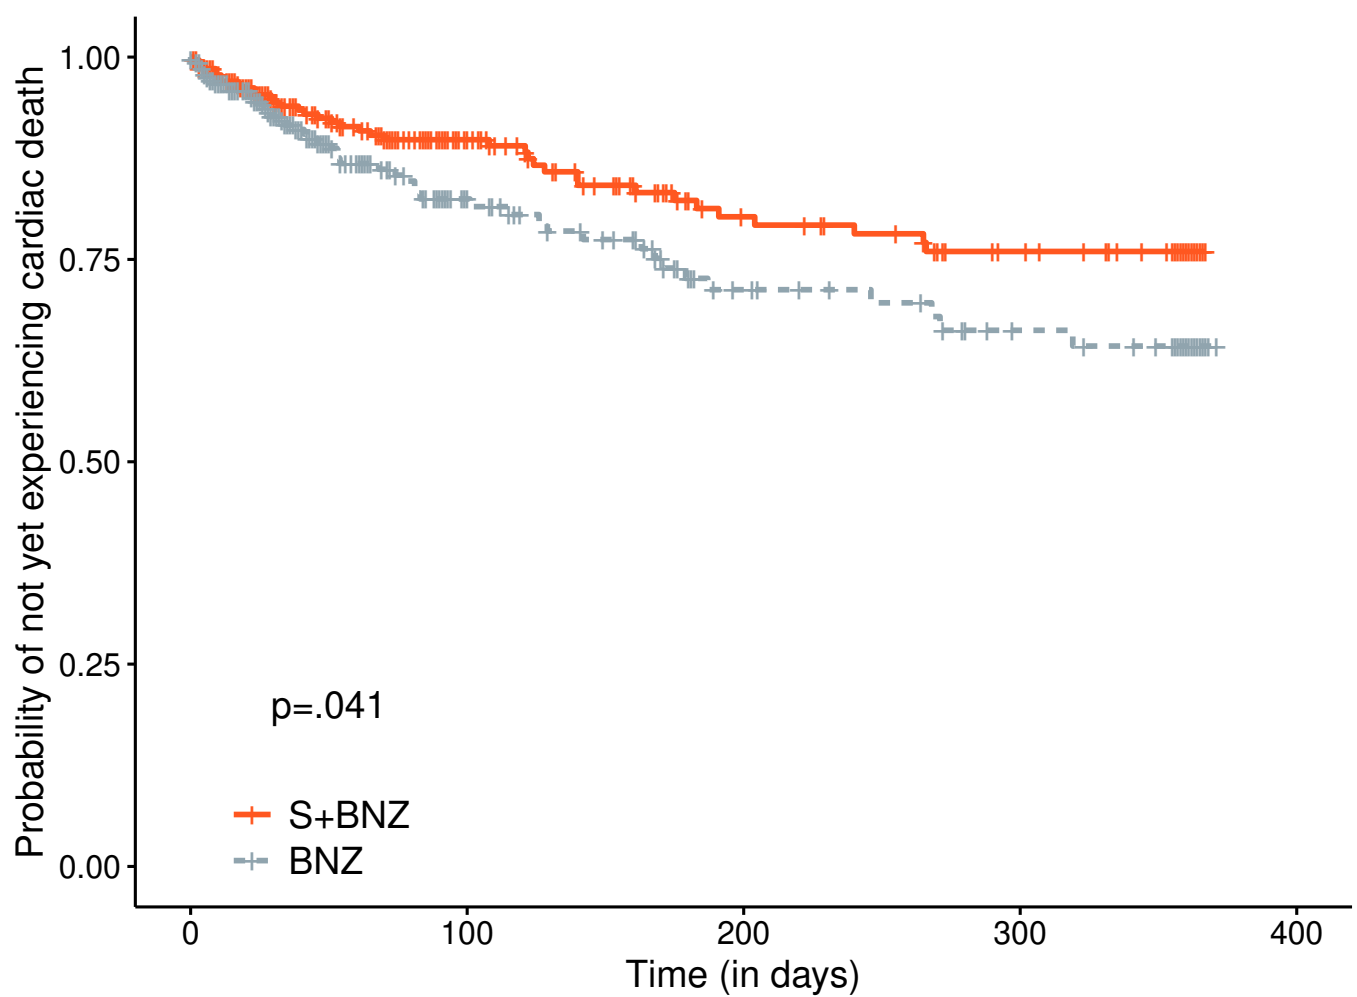

Supplement: JVIM-35-1673-s003.pdf [file JVIM-35-1673-s003.pdf]
